# Supplementary material for: The prognostic influence of lymphatic endothelium–specific hyaluronan receptor 1 in cancer: A systematic review
Source: PubMed Central journal article supplement — Cancer Sci. 2021 Nov 24;113(1):17–27. doi: 10.1111/cas.15199 (PMC8748220; doi:10.1111/cas.15199), 2021-11-24
Supplement: CAS-113-17-s001.pdf [file CAS-113-17-s001.pdf]

**Supplementary Table 1: Summary of the bias assessment results of the included studies**

| Study | Q1. | Q2. | Q3. | Q4. | Q5 | Q6. | Q7. | Q8. | Q9. | Q10. | %     | Risk of bias |
|-------|-----|-----|-----|-----|----|-----|-----|-----|-----|------|-------|--------------|
| (12)  | Y   | Y   | Y   | U   | N  | Y   | Y   | NA  | NA  | Y    | 0.75  | low          |
| (14)  | Y   | Y   | Y   | Y   | U  | Y   | Y   | NA  | NA  | N    | 0.75  | low          |
| (16)  | Y   | Y   | Y   | U   | U  | Y   | Y   | NA  | NA  | Y    | 0.75  | low          |
| (15)  | Y   | Y   | Y   | N   | U  | N   | Y   | NA  | NA  | Y    | 0.625 | low          |
| (20)  | Y   | Y   | Y   | U   | U  | Y   | Y   | NA  | NA  | Y    | 0.75  | low          |
| (17)  | Y   | Y   | Y   | U   | U  | Y   | Y   | NA  | NA  | N    | 0.625 | low          |
| (19)  | Y   | Y   | Y   | U   | U  | Y   | Y   | NA  | NA  | Y    | 0.75  | low          |
| (18)  | Y   | Y   | Y   | U   | U  | Y   | Y   | NA  | NA  | Y    | 0.75  | low          |
| (21)  | Y   | Y   | Y   | N   | N  | Y   | Y   | NA  | NA  | Y    | 0.75  | low          |
| (22)  | Y   | Y   | Y   | Y   | N  | Y   | Y   | NA  | NA  | Y    | 0.875 | low          |
| (23)  | Y   | Y   | Y   | Y   | N  | Y   | Y   | NA  | NA  | Y    | 0.875 | low          |
| (24)  | Y   | Y   | Y   | N   | N  | Y   | Y   | NA  | NA  | N    | 0.625 | low          |
| (27)  | Y   | Y   | Y   | U   | U  | Y   | Y   | NA  | NA  | Y    | 0.75  | low          |
| (26)  | Y   | Y   | Y   | U   | U  | Y   | Y   | NA  | NA  | Y    | 0.75  | low          |
| (25)  | Y   | Y   | Y   | U   | U  | Y   | Y   | NA  | NA  | Y    | 0.75  | low          |
| (28)  | Y   | Y   | Y   | N   | U  | Y   | Y   | NA  | NA  | Y    | 0.75  | low          |
| (29)  | Y   | Y   | Y   | Y   | U  | Y   | Y   | NA  | NA  | Y    | 0.875 | low          |
| (30)  | Y   | Y   | Y   | U   | U  | Y   | Y   | NA  | NA  | Y    | 0.75  | low          |

Y = Yes; N = No; U = Unclear; NA = Not applicable. The assessment questions were as follows: Q1. Were there clear criteria for inclusion in the case series?; Q2. Was the condition measured in a standard, reliable way for all participants included in the case series?; Q3. Were valid methods used for identification of the condition for all participants included in the case series?; Q4. Did the case series have consecutive inclusion of participants?; Q5. Did the case series have complete inclusion of participants?; Q6. Was there clear reporting of the demographics of the participants in the study?; Q7. Was there clear reporting of clinical information of the participants?; Q8. Were the outcomes or follow-up results of cases clearly reported?; Q9. Was there clear reporting of the presenting site(s)/clinic(s) demographic information?; Q10. Was the statistical analysis appropriate?
